# Supplementary material for: A microRNA encoded by HSV-1 inhibits a cellular transcriptional repressor of viral immediate early and early genes
Source: Springer Nature journal article supplement (doi:10.1007/s11427-013-4458-4), 2013-03-19
Supplement: 11427_2013_4458_MOESM1_ESM.pdf [file 11427_2013_4458_MOESM1_ESM.pdf]

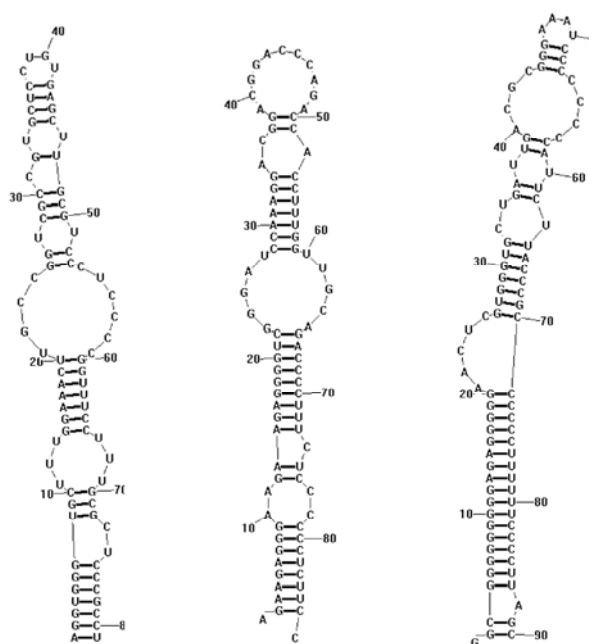

**Figure S1** Three potential hairpin structures in non-coding regions of the HSV-1 genome were predicted by computational analysis.

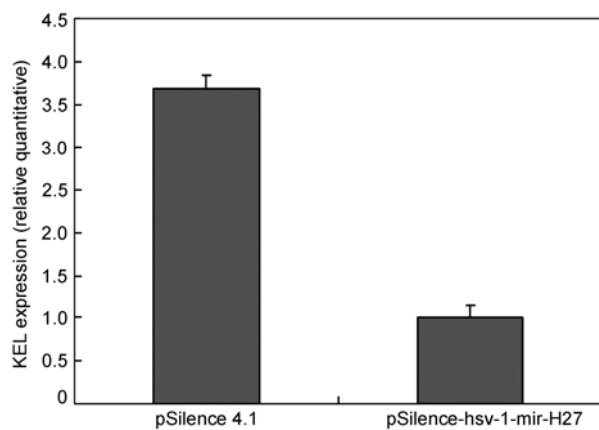

**Figure S2** KEL mRNA was inhibited by hsv1-mir-H27. Cells were transfected with 3  $\mu$ g of pSilence-hsv1-mir-H27 or pSilence 4.1 and harvested 18 h post-transfection. Reverse transcription was performed with Kel-rltm-R or  $\beta$ -actin-R followed by quantitative real-time PCR with Kel-rltm-F and Kel-rltm-R or  $\beta$ -actin-F and  $\beta$ -actin-R primers. Data were normalized based on the  $\beta$ -actin control and calculated by  $\log_2^{-\Delta\Delta C_t}$ ,  $n=3$ .

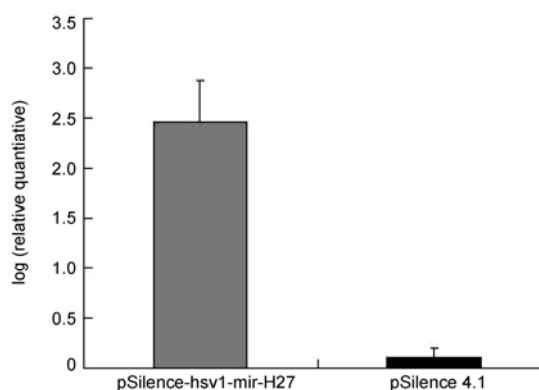

**Figure S3** MiRNA hsv1-mir-H27 was highly expressed by pSilence-hsv1-mir-H27. Cells were transfected with 3  $\mu$ g of pSilence-hsv1-mir-H27 or pSilence 4.1 and harvested 24 h post-transfection. Reverse transcription was performed with mi-loop or u6-loop primers followed by quantitative real-time PCR with mi F and mi R or u6 F and u6 R primers. Data were normalized based on the u6 control and calculated by  $\log_2^{-\Delta\Delta C_t}$ ,  $n=3$ .

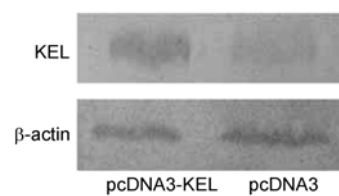

**Figure S4** Western blot analysis showing that KEL is expressed in cells transfected with the eukaryotic. Cells were transfected with 3  $\mu$ g of pcDNA3-KEL or pcDNA3 and harvested 24 h post-transfection. Western blot analysis was conducted with a mouse polyclonal antibody against its N-terminus and normalized to the levels of  $\beta$ -actin detected with a mouse polyclonal antibody Western blot.

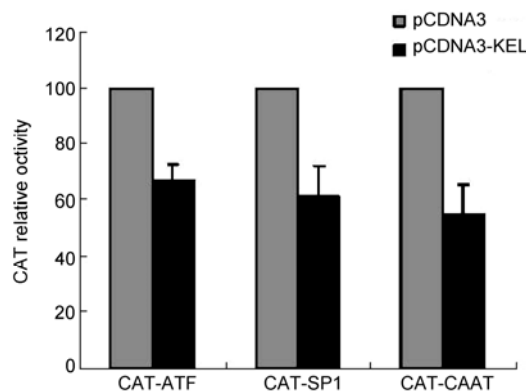

**Figure S5** KEL effect on the function of different upstream transcriptional activating elements. One microgram of the CAT reporter gene expression plasmids (pCAT-ATF, pCAT-SP1, or pCAT-CAAT) were co-transfected into cells with 2  $\mu$ g of pcDNA3-KEL. The CAT relative activity values in each experimental group were calculated by assigning a value of 100 to values resulting from transfection of 1  $\mu$ g of the CAT reporter gene expression plasmid and relevant amounts of pcDNA3,  $n=3$ .

**Table S1** Sequences of three potential hairpin structures in the non-coding regions of the HSV-1 genome

| Probe numbers | Location    | Size (bp) | Sequence                                                                                        |
|---------------|-------------|-----------|-------------------------------------------------------------------------------------------------|
| P1            | 86230-86302 | 81        | 5'-AGGUGGGUGCUUUGGAAACUUGCCGGUCGCCGU<br>GCUCCUGUGAGCUUGCGUCCUCCCCGGUUUCC<br>UUUGCGUCCCGCCU-3'   |
| P2            | 2882-2964   | 83        | 5'-AGAAGAGGGAAGAAGAGGGGUCGGGAUCCA<br>AAGGACGGACCCAGACCACCUUUGGUUGCAGAC<br>CCCUUUCUCCCCCUCUCC-3' |
| P3            | 2994-3083   | 90        | 5'-GGCGGGGGGGGAGAGGGGAACUCGUGGG<br>UGCUGAUUGACGCGGAAAUCCCCCCAUUCU<br>UACCCGCCCCUUUUUCCCUUAGC-3' |

**Table S2** Sequences of three potential miRNA and its probes

| Probe numbers | Sequences of probe                               | Predicted miRNA sequences            |
|---------------|--------------------------------------------------|--------------------------------------|
| Probe.1       | 5'-GCG ACC GGC AAG TTT CCA AAG CAC CCA<br>CCT-3' | 5'-GGG UGC UUU GGA AAC UUG CCG GU-3' |
| Probe.2       | 5'-GGA AGA GGG GGG AGA AAG GGG TCT GCA<br>ACC-3' | 5'-CAG ACC CCU UUC UCC CCC CUC UU-3' |
| Probe.3       | 5'-GGC GGG GGG GGG AGA GGG GGA ACT CGT<br>GGG-3' | 5'-CCA CGA GUU CCC CCU CUC CCC C-3'  |
